# Supplementary material
Source: PubMed Central journal article supplement (PMC4120931)
Supplement: Supp_Fig1.pdf [file Supp_Fig1.pdf]

## Supplementary Data

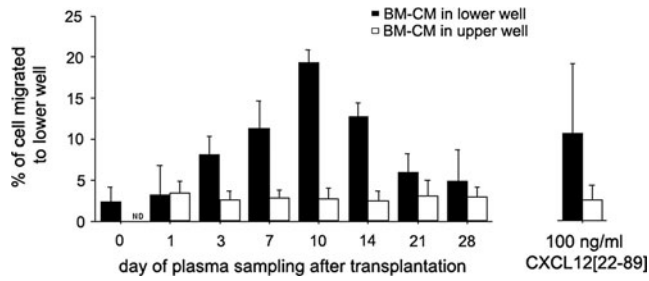

**SUPPLEMENTARY FIG. S1.** Transmigration of hematopoietic progenitor cells stimulated by bone marrow-conditioned medium (BM-CM). BM-CM was obtained at various intervals after BM transplantation. Twenty thousand FDCP-mix hematopoietic progenitor cells were added into upper wells of a transmigration chamber, and BM-CM (50% v/v) were added into either the lower wells only (black boxes) or both upper and lower wells (white boxes). CXCL12[22–89] (100 ng/mL) was used as a positive control. The values are the means  $\pm$  SD;  $n=6$ . ND, not determined; SD, standard deviation.
