# Supplementary material
Source: PubMed Central journal article supplement (PMC4120931)
Supplement: Supp_Fig2.pdf [file Supp_Fig2.pdf]

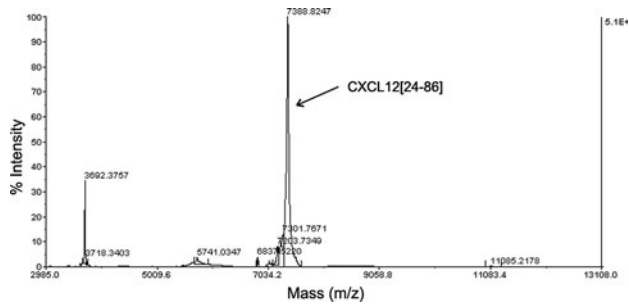

**SUPPLEMENTARY FIG. S2.** Proteolytic processing of CXCL12 by DPPIV. Identification of a decay product of CXCL12[22–86] by DPPIV. One microgram of CXCL12 [22–86] was incubated with 0.1  $\mu$ g DPPIV overnight at 30°C and subjected to MALDI-MS analysis as described in the “Materials and Methods” section. The samples were evaluated with an analytical RP chromatographic column, and the collected fractions were analyzed by MALDI-MS. DPPIV, dipeptidylpeptidase IV; MALDI-MS, matrix-assisted laser desorption/ionization–mass spectrometry; RP, reverse phase.
