# Supplementary material
Source: PubMed Central journal article supplement (PMC4120931)
Supplement: Supp_Table1.pdf [file Supp_Table1.pdf]

SUPPLEMENTARY TABLE S1. THE EXPRESSION  
OF HEMATOPOIETIC STEM AND PROGENITOR CELLS'  
CHEMOTACTIC ACTIVITY IN BONE MARROW,  
LIVER, SPLEEN, AND LUNG TISSUES

| <i>Transmigrated cells (% of CXCL12[22–89])</i> |                  |                 |
|-------------------------------------------------|------------------|-----------------|
| <i>Tissue source</i>                            | <i>Untreated</i> | <i>Post-BMT</i> |
| Bone marrow                                     | 21.7 ± 17.4      | 104.3 ± 32.6    |
| Liver                                           | 13.1 ± 6.8       | 112.6 ± 21.3    |
| Spleen                                          | 6.2 ± 9.8        | 83.6 ± 22.9     |
| Lung                                            | 1.2 ± 1.0        | 1.0 ± 0.9       |
| Blood plasma                                    | 0 ± 0            | 35.0 ± 16.8     |

Organs and BM were prepared from mice at 7 days after BM transplantation. Organ slices and BM were treated with cell culture medium for 6 h and subsequently subjected to transwell chemotaxis assays performed with FDCP-mix HPCs. The given values are the mean ± SD; *n* = 6.

BM, bone marrow; BMT, bone marrow transplantation; HPC, hematopoietic stem and progenitor cells; SD, standard deviation.
